1 **Title: Comparing rates of introgression in parasitic feather lice with differing**  
2 **dispersal capabilities**

3 **Authors:** Jorge Doña<sup>1\*</sup>, Andrew D. Sweet<sup>1,2</sup>, and Kevin P. Johnson<sup>1\*</sup>

4 **Affiliations:**

5 <sup>1</sup>Illinois Natural History Survey, Prairie Research Institute, University of Illinois at Urbana-  
6 Champaign, 1816 S. Oak St., Champaign, Illinois 61820, USA.

7 <sup>2</sup>Department of Entomology, Purdue University, 901 W. State St., West  
8 Lafayette, Indiana 47907, USA.

9 \*Correspondence to: [jorged@illinois.edu](mailto:jorged@illinois.edu), [kpjohnso@illinois.edu](mailto:kpjohnso@illinois.edu).

10 **Running title:** Dispersal and introgression rate.

11 **Author contributions:** J.D., and K.P.J. conceived the study. J.D., A.D.S., and K.P.J. designed  
12 the study. A.D.S. collected the data. J.D. and A.D.S. analysed the data. K.P.J. obtained financial  
13 support for the project. J.D. wrote the manuscript and all authors contributed to editing the  
14 manuscript.

15 **Acknowledgments:** This study was supported by the US National Science Foundation (DEB-  
16 1239788 and DEB-1342604 to K.P.J). We declare that we have no conflict of interest.

17 **Data availability:** All data needed to evaluate the conclusions in the paper are present in the  
18 paper and/or the Supplementary Materials. Additional data related to this paper may be requested  
19 from the authors.

20 **Supplementary Materials:** Supplementary data are available at Figshare (DOI:  
21 10.6084/m9.figshare.9176204).  
22

23 **Abstract:** Organisms vary in their dispersal abilities, and these differences can have important  
24 biological consequences, such as impacting the likelihood of hybridization events. However,  
25 there is still much to learn about the factors influencing hybridization, and specifically how  
26 dispersal ability affects the opportunities for hybridization. Here, using the ecological replicate  
27 system of dove wing and body lice (Insecta: Phthiraptera), we show that species with higher  
28 dispersal abilities exhibited increased genomic signatures of introgression. Specifically, we  
29 found a higher proportion of introgressed genomic reads and more reticulated phylogenetic  
30 networks in wing lice, the louse group with higher dispersal abilities. Our results are consistent  
31 with the hypothesis that differences in dispersal ability might drive the extent of introgression  
32 through hybridization. Overall, the results from this study represent an important step towards  
33 understanding the factors driving hybridization, and have major implications for coevolutionary  
34 biology.

35

## 36 **Introduction**

37 Dispersal is the permanent movement of organisms away from their place of origin. It is a  
38 fundamental process in biology with significant implications at multiple scales of organization  
39 (Barton 1992; Clobert et al. 2001; Nathan 2001; Matthysen 2012), including the reproduction of  
40 individuals, the composition of populations and communities, and the geographical distribution  
41 of species (Clobert et al. 2001, 2012).

42 Organisms differ in their dispersal abilities, and these differences have an impact on their  
43 biology, such as on the distributional range of a species or gene flow between populations  
44 (Bohonak 1999). For example, organisms with lower dispersal abilities tend to have smaller  
45 distributional ranges and populations that are genetically more structured (Bohonak 1999;  
46 Dawson et al. 2014; DiBlasi et al. 2018).

47 Dispersal ability might also affect the opportunities for hybridization between species  
48 because the rates at which individuals encounter different species are likely to be higher in  
49 organisms with higher dispersal capabilities. Indeed, recent evidence supports this prediction by  
50 demonstrating that range expansion is associated with the extent of introgression (Currat et al.  
51 2008; Nussberger et al. 2018). Similarly, dispersal differences explain more than 30% of the  
52 variation in the width of hybrid zones across animals (McEntee et al. 2018). However, overall  
53 there is still much to learn about the factors influencing hybridization (Randler 2006; Arnold  
54 2015; Taylor and Larson 2019), and, in particular, the influence of dispersal ability on the rate of  
55 hybridization remains understudied.

56 Comparisons of the effect of dispersal on hybridization should ideally hold constant most  
57 factors other than dispersal. The ecological replicate system of wing and body lice (Insecta:  
58 Phthiraptera) of pigeons and doves (Aves: Columbidae) has proven to be an ideal system for

59 comparing the impact of dispersal differences on other aspects of biology, such as population  
60 structure and codivergence (Clayton and Johnson 2003; Johnson and Clayton 2004; Clayton et  
61 al. 2015; DiBlasi et al. 2018; Sweet and Johnson 2018). Specifically, this is an excellent system  
62 in which to assess the effect of differences in dispersal capabilities on levels of introgression  
63 because both of these two lineages of feather lice: 1) significantly differ in their dispersal ability  
64 (Harbison et al. 2008, 2009; Bartlow et al. 2016), 2) co-occur across the diversity of pigeons and  
65 doves, 3) present highly comparable temporal patterns of diversification, specifically, both  
66 lineages originated on the common ancestor of *Metriopelia* doves (11.3-14.9 mya) and have a  
67 correlated pattern of codiversification within the same group of hosts (including a shared  
68 cospeciation event which occurred within the *Metriopelia* genus 5.2-7.4 mya; Sweet and Johnson  
69 2015, 2018), 3) and have the same basic life history and diet (Clayton et al. 2015; Sweet and  
70 Johnson 2015, 2018). Both wing and body lice disperse vertically between parents and offspring  
71 in the nest. However, wing lice can also attach to and hitchhike on hippoboscid flies to disperse  
72 “phoretically” between host individuals or host species (Harbison et al. 2008, 2009; Bartlow et  
73 al. 2016). Indeed, this hitch-hiking dispersal mechanism profoundly influences their degree of  
74 population structure and cophylogenetic history (Clayton and Johnson 2003; Sweet et al. 2017b;  
75 DiBlasi et al. 2018; Sweet and Johnson 2018). In addition, wing lice have a higher rate of host-  
76 switching (Clayton and Johnson 2003; Clayton et al. 2015; Sweet et al. 2017b) (i.e., successful  
77 colonization of new host species) and of straggling (Whiteman et al. 2004) (i.e., dispersal to new  
78 host species without reproduction on that new host).

79 To compare differences in the extent of introgression between wing and body lice, we  
80 used whole-genome data from 71 louse individuals belonging to five taxa of wing lice  
81 (*Columbicola*) and seven taxa of body lice (*Physconelloides*) that occur across the same host

82 species and have highly comparable patterns of diversification (Sweet and Johnson 2015, 2018).  
83 We predicted that wing lice, which have higher dispersal abilities and thus higher odds of  
84 encountering individuals of a different louse species on the same host, should show more  
85 extensive evidence of introgression (Fig. 1).

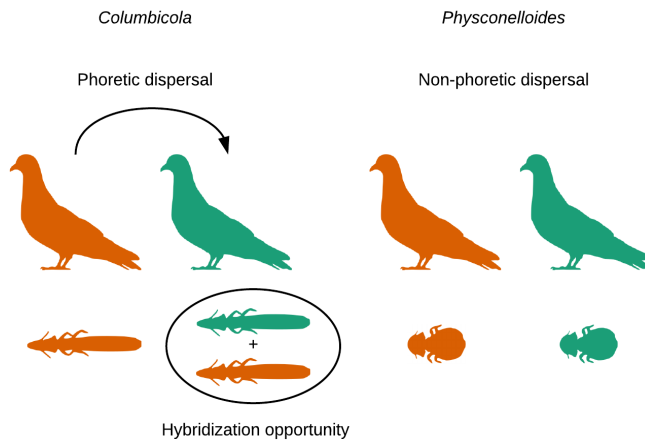

86  
87 **Figure 1.** Diagram depicting the ecological replicate system and the hypothesis of this study. Wing lice (*Columbicola*) have  
88 higher dispersal abilities than body lice (*Physconelloides*), and thus higher odds of encountering individuals of a different louse  
89 sp.

## 90 **Materials and Methods**

### 91 Data

92 We studied Illumina whole genome sequence data (150 or 160bp paired-end reads) from 71  
93 louse individuals belonging to five and seven taxa of *Columbicola* and *Physconelloides*,  
94 respectively (Supplementary Table S2). All raw sequence data used were available from  
95 previous studies (Boyd BM, et al. 2017; Sweet et al. 2017a; Sweet and Johnson 2018) and  
96 represent all described New World ground-dove wing and body louse species—most host species  
97 in this group—including lice samples across multiple biogeographic areas within species of hosts

98 (Sweet and Johnson 2018; Supplementary Table S2). Illumina genome sequence data pre-  
99 processing included several steps (Sweet and Johnson 2018). First, we discarded duplicate read  
100 pairs using the fastqSplitDups script (<https://github.com/McIntyre-Lab/mcscriptand>  
101 <https://github.com/McIntyre-Lab/mclib>). We then eliminated the Illumina sequencing adapters  
102 with Fastx\_clipper v0.014 from the FASTX-Toolkit ([http://hannonlab.cshl.edu/fastx\\_toolkit](http://hannonlab.cshl.edu/fastx_toolkit)).  
103 Also, we removed the first 5 nt from the 5' ends of reads using Fastx\_trimmer v0.014 and  
104 trimmed bases from the 3' ends of reads until reaching a base with a phred score  $\geq 28$  (which is  
105 equivalent to a base call accuracy higher than 99.8 %) using Fastq\_quality\_trimmer v0.014.  
106 Finally, we removed any reads less than 75 nt and analyzed the cleaned libraries with Fastqc  
107 v0.11.5 to check for additional errors. We assembled nuclear loci in aTRAM following previous  
108 studies (Allen et al. 2015; Boyd BM, et al. 2017; Sweet and Johnson 2018). In particular, we  
109 mapped modest coverage (25-60X), multiplexed genomic data to reference loci from a closely  
110 related taxon. For our reference set of nuclear loci for wing lice, we used 1,039 exons of  
111 *Columbicola drowni* (Boyd BM, et al. 2017) (raw data: SRR3161922). This data set was  
112 assembled de novo (Allen et al. 2015) using orthologous protein-coding genes from the human  
113 body louse genome (*Pediculus humanus humanus* (Kirkness et al. 2010) as a set of target  
114 sequences. We mapped *Columbicola* reads to the *C. drowni* references using Bowtie2  
115 (Langmead and Salzberg 2012). For body lice, we obtained nuclear data using the same pipeline  
116 and software parameters, except that we used 1,095 loci from *Physconelloides emersoni* as the  
117 reference for mapping. To generate the input ultrametric gene trees for Phylonet v3.6.8 (Than et  
118 al. 2008; Yu and Nakhleh 2015; Wen et al. 2018), we first aligned each nuclear locus in MAFFT  
119 (Kato 2002)(--auto) and removed columns with only ambiguous sequences ("N"). Then, we  
120 estimated gene trees in RAxML v8.1.3 (Stamatakis 2006) with a GTR +  $\Gamma$  substitution model for

121 each gene alignment. Finally, we made trees ultrametric using the `nnls` method in the  
122 `force.ultrametric` function within the “`phytools`” R package (Revell 2011).

### 123 Quantifying introgression

124 We used two different approaches to quantify differences in the extent of introgression (i.e.,  
125 ancient plus recent) between the two louse genera. We employed methods suitable to detect  
126 introgression between species and between individuals from the same species (i.e., we did not  
127 employ methods aimed to detect differences at the population level, e.g., TreeMix; Pickrell and  
128 Pritchard 2012). First, we used `sppIDer` (Langdon et al. 2018) to quantify the genomic  
129 contributions of different louse species in an individual louse genome (Fig. 2). We built our  
130 reference for each genus using all the nuclear loci from a single individual per species. For the  
131 reference, we selected those individuals for which we assembled the highest number of genes for  
132 each genus. We estimated the extent of introgression as the sum of the mean coverages of reads  
133 mapped from all the species excluding the focal louse species, divided by the mean coverage of  
134 the focal louse species (Fig. 2). Note that these mean coverage values are calculated using only

135 those reads that mapped with a mapping quality (MQ) > 3 (Li et al. 2009; Langdon et al. 2018;  
136 Figs. S1-S12).

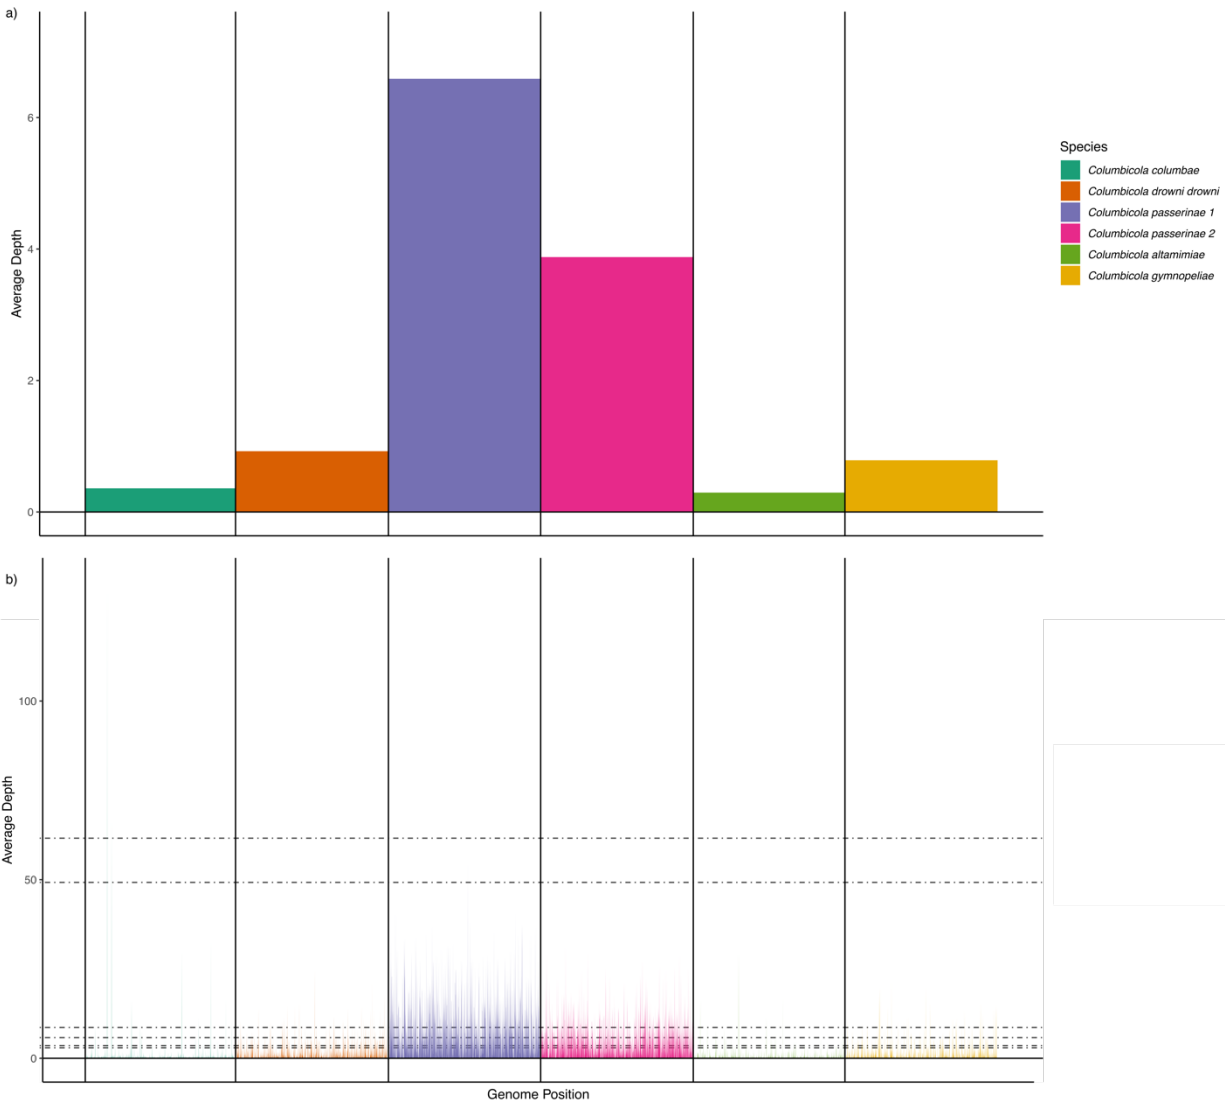

137

138 **Figure 2.** Illustrative example of sppIDer results with an individual of *Columbicola* (Cosp.Copas.11.7.2016.8). Panel a) shows  
139 the average mean coverages of reads mapping to every species (i.e., the values that were used for the calculations of introgression  
140 levels), and panel b) shows the mean coverages of reads mapping to each species across the whole set of loci. These and  
141 additional visualizations of all the individuals can be found in the supplementary material (Figs. S1-S12).

142

143 Second, we quantified introgression at the species level, while accounting for incomplete lineage  
144 sorting (ILS) (i.e., reticulations in this method can be attributed to hybridization events), using a  
145 maximum pseudo-likelihood framework with PhyloNet 3.6.1 (Than et al. 2008; Yu and Nakhleh



146 2015; Wen et al. 2018). We trimmed the unrooted gene trees to the same individuals used as  
147 reference taxa in sppIDer, and performed eleven independent analyses with a differing maximum  
148 number of reticulation nodes (i.e., from zero to ten). We conducted ten runs per analysis. We  
149 then selected the optimal network for each genus based on AIC values.

#### 150 Statistics and reproducibility

151 We compared the sppIDer results using generalized linear models (GLMs). We used a Gaussian  
152 distribution of errors and an identity link function. We performed one GLM for each simulation  
153 iteration using the glm function of the “stats” R package (R Core Team 2013). The extent of  
154 introgression for each louse genus was the dependent variable, the genus identity was the  
155 independent variable, and we accounted for the introgression differences between louse species  
156 including louse identity as a fixed factor. We confirmed assumptions underlying GLMs by  
157 testing the normality of regression residuals for normality against a Q-Q plot. We also  
158 considered the possibility that some of the reads mapping to other species were technical  
159 contaminations, i.e., due to index-swapping (Carlsen et al. 2012; Esling et al. 2015; Schnell et al.  
160 2015; Sinha et al. 2017). Previous studies have found that the misassignment of reads generally  
161 ranges from 1 to 9% (Carlsen et al. 2012; Esling et al. 2015; Schnell et al. 2015; Sinha et al.  
162 2017). Thus, to account for possible contaminants, we wrote a simulation in R that randomly  
163 subtracted 9% (Carlsen et al. 2012; Esling et al. 2015; Schnell et al. 2015; Sinha et al. 2017)  
164 from the mean coverage value of a particular sample (i.e., we subtracted a random proportion of  
165 the mean coverage value for each sample until reaching 9 %). We ran 100 iterations of the  
166 simulation and ran a GLM for each iteration (Table S1). Finally, we used the  $\chi^2$  test to compare  
167 the number of species in pairwise comparisons of each genus with the number of reticulations  
168 found in each optimal phylogenetic network. Because we had an *a priori* prediction that

169 *Physconelloides* should exhibit less evidence of reticulation than *Columbicola*, we used a one-  
170 tailed test; however, we also report the results of the two-tailed test equivalent.

## 171 Results

172 Both approaches revealed highly concordant results: higher levels of introgression among  
173 species of wing lice compared to body lice. In particular, using a read-mapping based method,  
174 the genomic signature of introgression was significantly higher in wing louse species than in  
175 body louse species (GLM with the mean values of the simulations;  $F = 21.0705$ ,  $df = 69$ ,  $P =$   
176  $2.367 \times 10^{-5}$ ,  $R^2=0.58$ ; Fig. 3, Supplementary Table S1, Figs. S1-S12). Contrary to this effect,  
177 one body louse individual (included in the GLMs) exhibited the highest level of introgression  
178 (Fig. 3, Figs. S1-S12). However, the other individual from the same taxon, inhabiting the same  
179 host species and collected in the same geographic region, did not show these elevated levels of  
180 introgression (Supplementary Table S2, Figs. S1-S12).

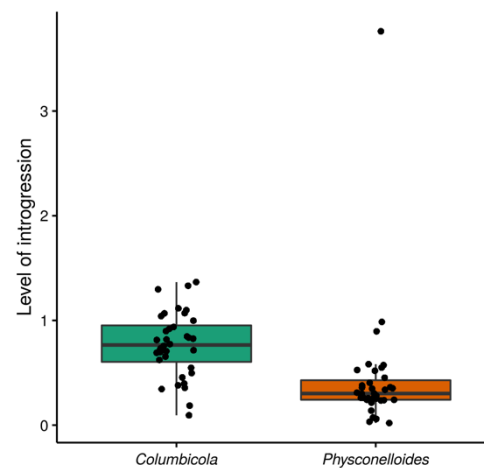

181  
**Figure 3.** Boxplot showing the differences in levels of introgression between wing (green) and body (orange) lice. Level of introgression represents the sum of the mean coverage of reads mapped from all the species excluding the focal louse species, divided by the mean coverage of the focal louse species (see Methods). Black dots show the levels of introgression (i.e., resulting from the equation) for each individual sample (horizontally jittered values).

184

185

186 Secondly, in a phylogenetic network framework, the optimal networks of wing lice were more  
187 reticulated than those of body lice even though the number of taxa included in the networks was  
188 lower (seven reticulations in *Columbicola* vs. four in *Physconelloides*, Fig. 4). Accordingly, the  
189 number of reticulations given the number of potential combinations under a one-tailed test was  
190 significantly higher in *Columbicola* (One-sided:  $\chi^2= 3.8132$ ;  $df=1$ ;  $P= 0.03$ ;  $CI=0.03-1$ ), and the  
191 p-value was still near 0.05 with a two-tailed test (Two-sided:  $\chi^2= 3.8132$ ;  $df=1$ ;  $P= 0.05$ ;  $CI=-$   
192  $0.01-0.66$ ). Also, the specific lineages involved in the reticulations were generally congruent  
193 with signatures of introgression from the read-mapping based approach (Fig. S1-S12).

194

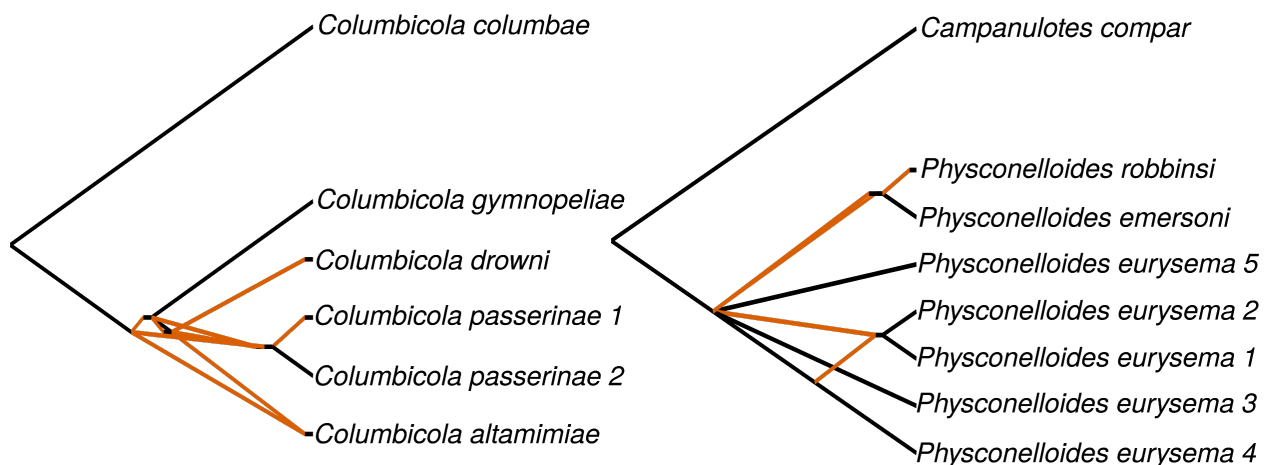

195 Figure 4. Optimal phylogenetic networks of feather lice genera. Orange branches depict reticulations: seven in *Columbicola* and  
196 four in *Physconelloides*. Note that though visually overlapped, every reticulation in this figure involves at least two taxa (extant  
197 or extinct). See the raw unedited networks (Figs. S13-S14) for more details on specific reticulations.

## 198 Discussion

199 Estimates of introgression in two groups of ectoparasites that differ in their dispersal abilities,  
200 wing and body lice of doves, indicate that the lineage with higher dispersal ability (wing lice)  
201 shows more evidence of introgression. This evidence from wing and body louse genomes is

202 consistent with the hypothesis that dispersal differences might drive differences in the level of  
203 introgression in this system of parasites. Admittedly, there may be some unknown factor, other  
204 than dispersal, differing between these two groups of lice that causes the difference in the level  
205 of introgression, but prior work on these groups of parasites points to dispersal as a crucial factor  
206 underlying many of the ecological and evolutionary patterns in these parasites. Further research  
207 on other taxa is needed to confirm the generality of these findings. This work is among the first  
208 studies of introgression in a host-symbiont system (Detwiler and Criscione 2010). Notably,  
209 recent studies have found that straggling and host-switching are relatively common processes in  
210 host-symbiont systems (De Vienne et al. 2013; Bourguignon et al. 2018; Nylin et al. 2018; Doña  
211 et al. 2019). Our study suggests that in a straggling/host-switching scenario, hybridization can  
212 provide further genetic variation with important ecological and evolutionary consequences (e.g.,  
213 facilitating adaptation to current hosts or facilitating the colonization of new ones) (Barton  
214 2018). Indeed, we may have found a potential recent hybridization event (i.e., the  
215 *Physconelloides* individual showing the highest level of introgression), though this requires  
216 further study to rule out methodological issues (e.g., wet-lab contamination).

217 In this vein, a careful examination of the introgression history of these taxa (and  
218 symbionts as a whole) is needed to better understand the patterns of introgression that we found.  
219 Questions such as how much introgression can be expected or how the introgressed regions are  
220 retained in parasite/symbiont genomes across time, among many others, require further attention  
221 and will certainly have a strong impact in coevolutionary biology theory. For instance, in this  
222 study, the levels of introgression detected by the sppIDer analyses (i.e., the magnitude but not the  
223 comparative pattern) may be unrealistic. It may be that some fraction of the level of introgression  
224 detected by sppIDer may be due to ILS, and not introgression. However, both louse genera are

225 expected to have relatively similar rates of ILS (if any), and our PhyloNet analysis, which does  
226 control for ILS, showed highly congruent results. On the other hand, sppIDer can detect  
227 introgression from species that are not included in the reference data (and, in those cases, the  
228 reads map to the closest taxon available in the reference, and thus could artificially increase the  
229 level of introgression from a given species; Langdon et al. 2018). Accordingly, the levels of  
230 introgression detected by sppIDer in certain species could be an aggregate of introgression  
231 events from more than one species. Indeed, our PhyloNet analysis supports this scenario, with  
232 several reticulations from ghost lineages and species (Figs. S13-S14), although in this system we  
233 have nearly complete sampling of host taxa and are missing few, if any, extant species.

234 Overall, the results from this study represent an important step towards understanding the  
235 factors driving hybridization, because most previous studies focus on the presence/absence of  
236 hybridization and the evolutionary consequences of hybridization (Arnold 2015; Folk et al. 2018;  
237 Taylor and Larson 2019). Further research is needed to understand the factors shaping the  
238 frequency of hybridization and to ascertain their influence across different scales (e.g., from  
239 ancient to recent hybridization events).

240

241

## 242 **References:**

- 243 Allen, J. M., D. I. Huang, Q. C. Cronk, and K. P. Johnson. 2015. aTRAM - automated target restricted assembly  
244 method: a fast method for assembling loci across divergent taxa from next-generation sequencing data.  
245 BMC Bioinformatics 16.
- 246 Arnold, M. L. 2015. Divergence with genetic exchange. OUP Oxford, Oxford, UK.

- 247 Bartlow, A. W., S. M. Villa, M. W. Thompson, and S. E. Bush. 2016. Walk or ride? Phoretic behaviour of  
248 amblyceran and ischnoceran lice. *Int J Parasitol* 46:221–227.
- 249 Barton, N. H. 2018. The consequences of an introgression event. *Mol Ecol* 27:4973–4975.
- 250 Barton, N. H. 1992. The genetic consequences of dispersal. In: *Animal Dispersal*. Springer, Netherlands.
- 251 Bohonak, A. J. 1999. Dispersal Gene Flow, and Population Structure. *Q Rev Biol* 74:21–45.
- 252 Bourguignon, T., N. Lo, C. Dietrich, J. Šobotník, S. Sidek, Y. Roisin, A. Brune, and T. A. Evans. 2018. Rampant  
253 host switching shaped the termite gut microbiome. *Curr Biol* 28:649–654.
- 254 Boyd BM, Allen JM, Nguyen N, Sweet AD, Warnow T, Shapiro MD, and et al. 2017. Phylogenomics using Target-  
255 restricted Assembly Resolves Intra-generic Relationships of Parasitic Lice (Phthiraptera: Columbicola).  
256 *Syst Biol* 66:896–911.
- 257 Carlsen, T., A. B. Aas, D. Lindner, T. Vrålstad, T. Schumacher, and H. Kausrud. 2012. Dont make a mista(g)ke: is  
258 tag switching an overlooked source of error in amplicon pyrosequencing studies? *Fungal Ecol* 5:747–749.
- 259 Clayton, D. H., S. E. Bush, and K. P. Johnson. 2015. *Coevolution of life on hosts: integrating ecology and history*.  
260 University of Chicago Press, Chicago, IL.
- 261 Clayton, D. H., and K. P. Johnson. 2003. Linking coevolutionary history to ecological process: doves and lice.  
262 *Evolution* 57:2335–2341.
- 263 Clobert, J., M. Baguette, T. G. Benton, and J. M. Bullock (eds). 2012. *Dispersal Ecology and Evolution*. Oxford  
264 University Press.
- 265 Clobert, J., E. Danchin, A. A. Dhondt, and N. J. D. 2001. *Dispersal*. Oxford Univ. Press.
- 266 Currat, M., M. Ruedi, R. J. Petit, and L. Excoffier. 2008. The hidden side of invasions: massive introgression by  
267 local genes. *Evolution* 62:1908–1920.
- 268 Dawson, M. N., C. G. Hays, R. K. Grosberg, and P. T. Raimondi. 2014. Dispersal potential and population genetic  
269 structure in the marine intertidal of the eastern North Pacific. *Ecol Monogr* 84:435–456.
- 270 De Vienne, D. M., G. Refrégier, M. López-Villavicencio, A. Tellier, M. E. Hood, and T. Giraud. 2013. Cospeciation  
271 vs host-shift speciation: methods for testing, evidence from natural associations and relation to coevolution.  
272 *New Phytol* 198:347–385.
- 273 Detwiler, J. T., and C. D. Criscione. 2010. An infectious topic in reticulate evolution: introgression and  
274 hybridization in animal parasites. *Genes (Basel)* 1:102–23.

- 275 DiBlasi, E., K. P. Johnson, S. A. Stringham, A. N. Hansen, A. B. Beach, and D. H. Clayton. 2018. Phoretic dispersal  
276 influences parasite population genetic structure. *Mol Ecol* 27:2770–2779.
- 277 Doña, J., D. Serrano, S. Mironov, A. Montesinos-Navarro, and R. Jovani. 2019. Unexpected bird–feather mite  
278 associations revealed by DNA metabarcoding uncovers a dynamic ecoevolutionary scenario. *Mol Ecol*  
279 28:379–390.
- 280 Esling, P., F. Lejzerowicz, and J. Pawlowski. 2015. Accurate multiplexing and filtering for high-throughput  
281 amplicon-sequencing. *Nucleic Acids Res* 43:2513–24.
- 282 Folk, R. A., P. S. Soltis, D. E. Soltis, and R. Guralnick. 2018. New prospects in the detection and comparative  
283 analysis of hybridization in the tree of life. *Am J Bot* 105:364–375.
- 284 Harbison, C. W., S. E. Bush, J. R. Malenke, and D. H. Clayton. 2008. Comparative transmission dynamics of  
285 competing parasite species. *Ecology* 89:3186–3194.
- 286 Harbison, C. W., M. V. Jacobsen, and D. H. Clayton. 2009. A hitchhiker’s guide to parasite transmission: The  
287 phoretic behaviour of feather lice. *Int J Parasitol* 39:569–575.
- 288 Johnson, K. P., and D. H. Clayton. 2004. Untangling coevolutionary history. *Syst Biol* 53:92–4.
- 289 Katoh, K. 2002. MAFFT: a novel method for rapid multiple sequence alignment based on fast Fourier transform.  
290 *Nucleic Acids Res* 30:3059–3066.
- 291 Kirkness, E. F., B. J. Haas, W. Sun, H. R. Braig, M. A. Perotti, and J. M. Clark. 2010. Genome sequences of the  
292 human body louse and its primary endosymbiont provide insights into the permanent parasitic lifestyle.  
293 *Proc Natl Acad Sci U S A* 107:12168–73.
- 294 Langdon, Q. K., D. Peris, B. Kyle, and C. T. Hittinger. 2018. sppIDer: A Species Identification Tool to Investigate  
295 Hybrid Genomes with High-Throughput Sequencing. *Mol Biol Evol* 35:2835–2849.
- 296 Langmead, B., and S. L. Salzberg. 2012. Fast gapped-read alignment with Bowtie 2. *Nat Methods* 9:357–9.
- 297 Li, H., B. Handsaker, A. Wysoker, T. Fennell, J. Ruan, N. Homer, G. Marth, G. Abecasis, and R. Durbin. 2009. The  
298 sequence alignment/map format and SAMtools. *Bioinformatics* 25:2078–2079. Oxford University Press.
- 299 Matthysen, E. 2012. Multicausality of dispersal: a review. In: *Dispersal Ecology and Evolution*. Oxford University  
300 Press.
- 301 McEntee, J. P., J. G. Burleigh, and S. Singhal. 2018. Dispersal predicts hybrid zone widths across animal diversity:  
302 Implications for species borders under incomplete reproductive isolation. *bioRxiv*, doi: 10.1101/472506.

- 303 Nathan, R. 2001. The challenges of studying dispersal. *Trends Ecol Evol* 16:481–483.
- 304 Nussberger, B., M. Currat, C. S. Quilodran, N. Ponta, and L. F. Keller. 2018. Range expansion as an explanation for  
305 introgression in European wildcats. *Biol Conserv* 218:49–56.
- 306 Nylin, S., S. Agosta, S. Bensch, W. A. Boeger, M. P. Braga, D. R. Brooks, M. L. Forister, P. A. Hambäck, E. P.  
307 Hoberg, and T. Nyman. 2018. Embracing colonizations: a new paradigm for species association dynamics.  
308 *Trends Ecol Evol* 33:4–14.
- 309 Pickrell, J. K., and J. K. Pritchard. 2012. Inference of Population Splits and Mixtures from Genome-Wide Allele  
310 Frequency Data. *PLoS Genetics* 8.
- 311 R Core Team. 2013. R: A language and environment for statistical computing.
- 312 Randler, C. 2006. Behavioural and ecological correlates of natural hybridization in birds. *Ibis* 148:459–467.
- 313 Revell, L. 2011. phytools: an R package for phylogenetic comparative biology (and other things). *Methods Ecol*  
314 *Evol* 3:217–223.
- 315 Schnell, I. B., K. Bohmann, and M. T. Gilbert. 2015. Tag jumps illuminated—reducing sequence-to-sample  
316 misidentifications in metabarcoding studies. *Mol Ecol Resour* 15:1289–303.
- 317 Sinha, R., G. Stanley, G. S. Gulati, C. Ezran, K. J. Travaglini, and E. Wei. 2017. Index Switching Causes Spreading-  
318 Of-Signal Among. *bioRxiv*, doi: 10.1101/125724.
- 319 Stamatakis, A. 2006. RAxML-VI-HPC: maximum likelihood-based phylogenetic analyses with thousands of taxa  
320 and mixed models. *Bioinformatics* 22:2688–2690.
- 321 Sweet, A. D., B. M. Boyd, J. M. Allen, S. M. Villa, M. P. Valim, and J. L. Rivera-Parra. 2017a. Integrating  
322 phylogenomic and population genomic patterns in avian lice provides a more complete picture of parasite  
323 evolution. *Evolution* 72:95–112.
- 324 Sweet, A. D., R. T. Chesser, and K. P. Johnson. 2017b. Comparative cophylogenetics of Australian phabine pigeons  
325 and doves (Aves: Columbidae) and their feather lice (Insecta: Phthiraptera). *Int J Parasitol* 47:347–356.
- 326 Sweet, A. D., and K. P. Johnson. 2015. Patterns of diversification in small New World ground doves are consistent  
327 with major geologic events. *Auk* 132:300–312.
- 328 Sweet, A. D., and K. P. Johnson. 2018. The role of parasite dispersal in shaping a host–parasite system at multiple  
329 evolutionary scales. *Mol Ecol* 27:5104–5119.



- 330 Taylor, S. A., and E. L. Larson. 2019. Insights from genomes into the evolutionary importance and prevalence of  
331 hybridization in nature. *Nat Ecol Evol* 3:170.
- 332 Than, C., D. Ruths, and L. Nakhleh. 2008. PhyloNet: a software package for analyzing and reconstructing reticulate  
333 evolutionary relationships. *BMC Bioinformatics* 9:322.
- 334 Wen, D., Y. Yu, J. Zhu, and L. Nakhleh. 2018. Inferring Phylogenetic Networks Using PhyloNet. *Syst Biol* 67:735–  
335 740.
- 336 Whiteman, N. K., D. Santiago-Alarcon, K. P. Johnson, and P. G. Parker. 2004. Differences in straggling rates  
337 between two genera of dove lice (Insecta: Phthiraptera) reinforce population genetic and cophylogenetic  
338 patterns. *Int J Parasitol* 34:1113–1119.
- 339 Yu, Y., and L. Nakhleh. 2015. A maximum pseudo-likelihood approach for phylogenetic networks. *BMC Genomics*  
340 16:Suppl 10: S10.
- 341
- 342
